# Supplementary material for: Integration and calibration of non-dispersive infrared (NDIR) CO 2 low-cost sensors and their operation in a sensor network covering Switzerland
Source: Copernicus journal article supplement (doi:10.5194/amt-13-3815-2020), 2020-07-15
Supplement: Supplementary file 2 [file amt-13-3815-2020-supplement.pdf]

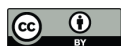

*Supplement of*

## **Integration and calibration of non-dispersive infrared (NDIR) CO<sub>2</sub> low-cost sensors and their operation in a sensor network covering Switzerland**

**Michael Müller et al.**

*Correspondence to:* Christoph Hüglin ([christoph.hueglin@empa.ch](mailto:christoph.hueglin@empa.ch))

The copyright of individual parts of the supplement might differ from the CC BY 4.0 License.

# 1 CO<sub>2</sub> molar fraction at sites equipped with high-precision instruments

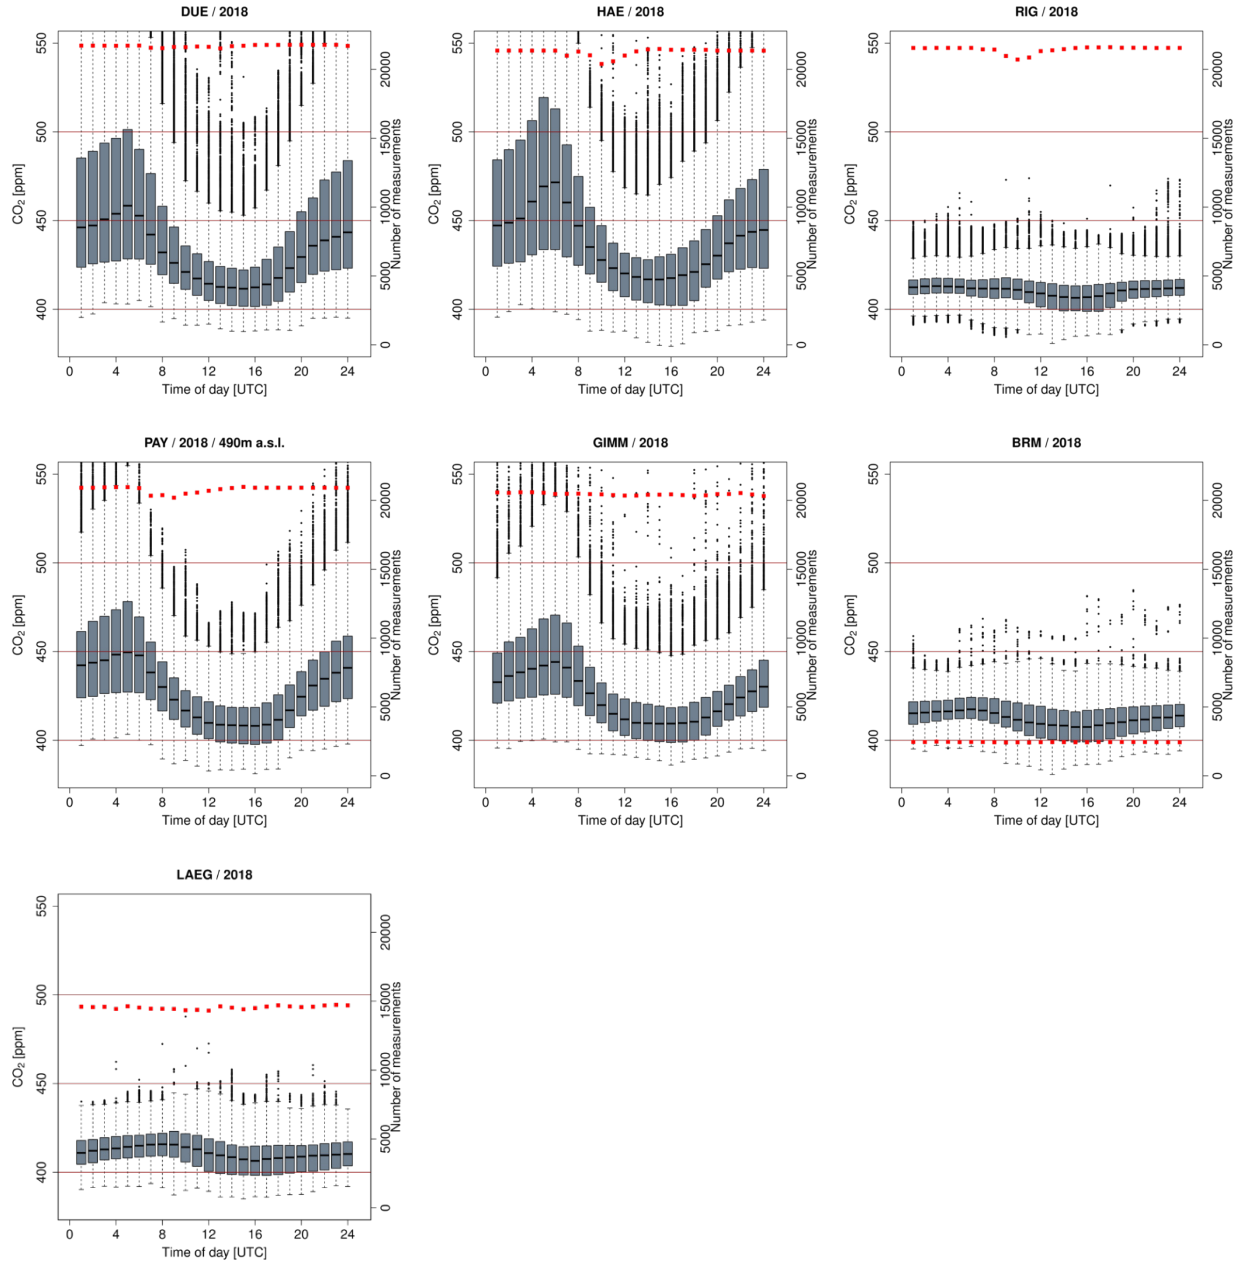

5 **Figure 1: Boxplots of CO<sub>2</sub> molar fraction referring to time of day observed at sites equipped with high-precision instruments in the year 2018. At BRM the air is probed sequentially at five different heights. Therefore, the number of measurements is smaller than for the other sites. Here, molar fraction from probing in 12 m height is shown. The locations of the sites are depicted in Figure 1 of the publication.**

## 2 Locations of MeteoSwiss SwissMetNet sites

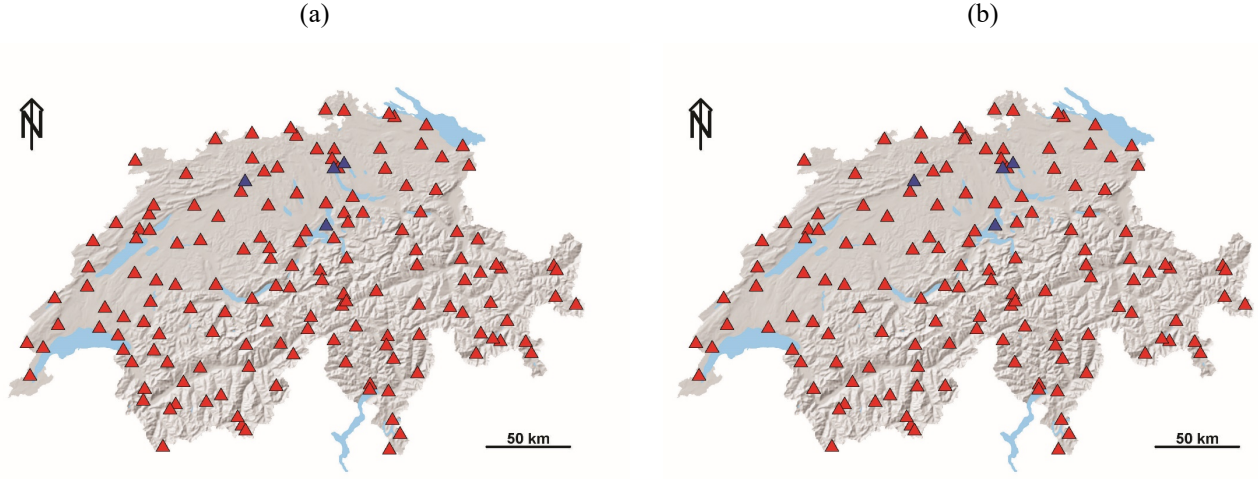

Figure 2: MeteoSwiss SwissMetNet sites (red triangles) and sites of the Swiss National Air Pollution Monitoring network (blue triangles) providing measurements of (a) wind speed and wind direction, and (b) pressure.

## 3 Comparison of meteorological measurements derived by the sensor units and by instruments of MeteoSwiss SwissMetNet sites

### 3.1 Computation of the mole fraction of H<sub>2</sub>O

The water vapour saturation pressure  $p_\sigma$  is computed by following formula (Wagner & Pruß, 2002)

$$p_\sigma = p_c \cdot e^{\left(\frac{T_c}{T} (a_1 \cdot \vartheta + a_2 \cdot \vartheta^{1.5} + a_3 \cdot \vartheta^3 + a_4 \cdot \vartheta^{3.5} + a_5 \cdot \vartheta^4 + a_6 \cdot \vartheta^{7.5})\right)}$$

Here,  $p_c$  is the critical pressure of water (22064000 Pa),  $T_c$  is the critical temperature of water (647.096 K),  $T$  is the temperature (K), and  $\vartheta$  equals  $(1 - T_c/T)$ . The coefficients  $a_1$  to  $a_6$  have the values:  $a_1 = -7.859\,517\,83$ ,  $a_2 = 1.844\,082\,59$ ,  $a_3 = -11.786\,649\,7$ ,  $a_4 = 22.680\,741\,1$ ,  $a_5 = -15.961\,871\,9$  and  $a_6 = 1.801\,225\,02$ .

The water vapour pressure  $p_w$  is obtained by  $p_\sigma$  and the relative humidity RH [%].

$$p_w = \frac{RH \cdot p_\sigma}{100}$$

The mole fraction of H<sub>2</sub>O in [%] is computed by

$$\chi_{H_2O} = \frac{p_w}{p} \cdot 100$$

### 3.2 Comparison of temperature and relative humidity from the Sensirion SHT21 sensors and from instruments of the MeteoSwiss SwissMetNet sites

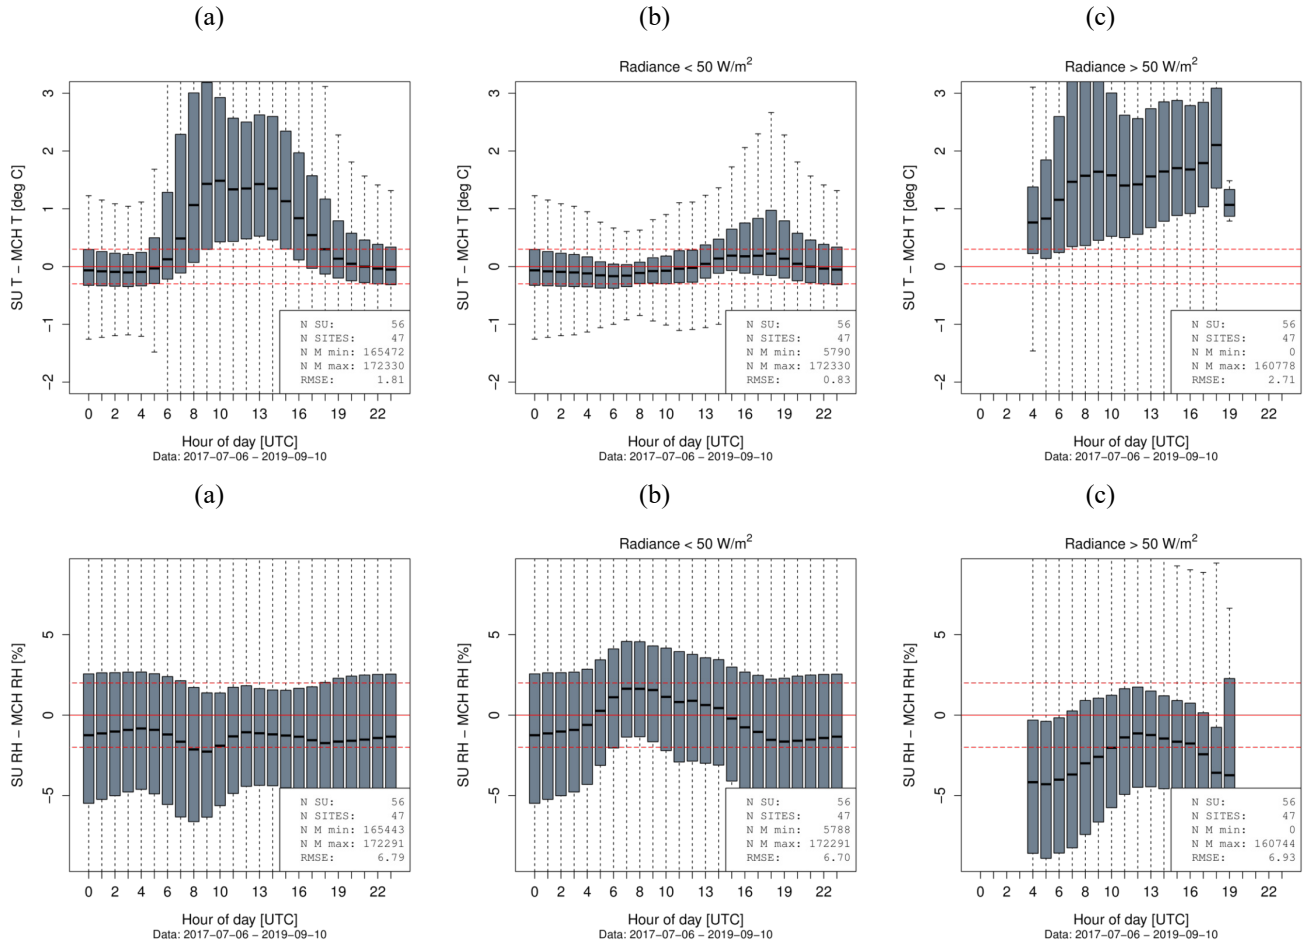

Figure 3: Comparison of temperature (first row) and relative humidity (second row) between the SHT21 sensor within the sensor unit (located at 9.5 m above ground) and the instruments at the MeteoSwiss SwissMetNet sites (located at 2 m above ground). (a) Comparison based on all measurements. (b) Comparison based on the measurements when global radiation is below 50 W/m². (c) Comparison based on the measurements when global radiation is above 50 W/m². The dashed horizontal lines depict the accuracy of the SHT21 sensor for T ( $\pm 0.3^\circ\text{C}$ ) and RH ( $\pm 2\%$ ).

### 3.3 Comparison of water molar fraction computed for the sensor units and computed from reference measurements of the MeteoSwiss SwissMetNet sites

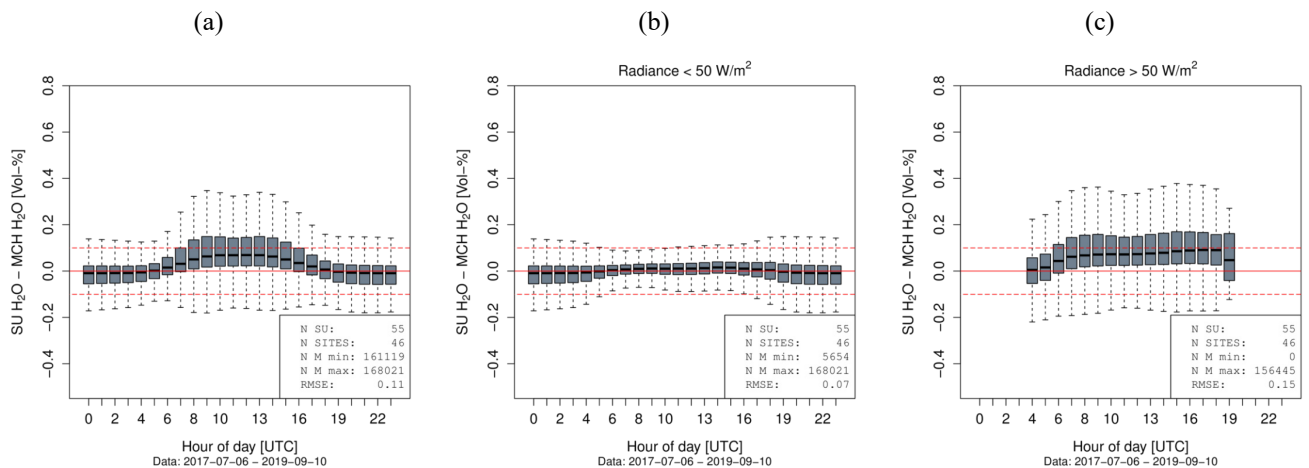

Figure 4: Comparison of the water volume fraction computed based on measurements from the SHT21 sensor (T/RH) and the interpolated pressure and the water volume fraction computed from reference measurements at the MeteoSwiss SwissMetNet sites. (a) Comparison based on all measurements. (b) Comparison based on the measurements when global radiation is below 50 W/m². (c) Comparison based on the measurements when global radiation is above 50 W/m². The dashed horizontal lines depict the  $\pm 0.1\%$  level.



#### 4 Differences between measurements from HAE and DUE depending on options for measurement filtering

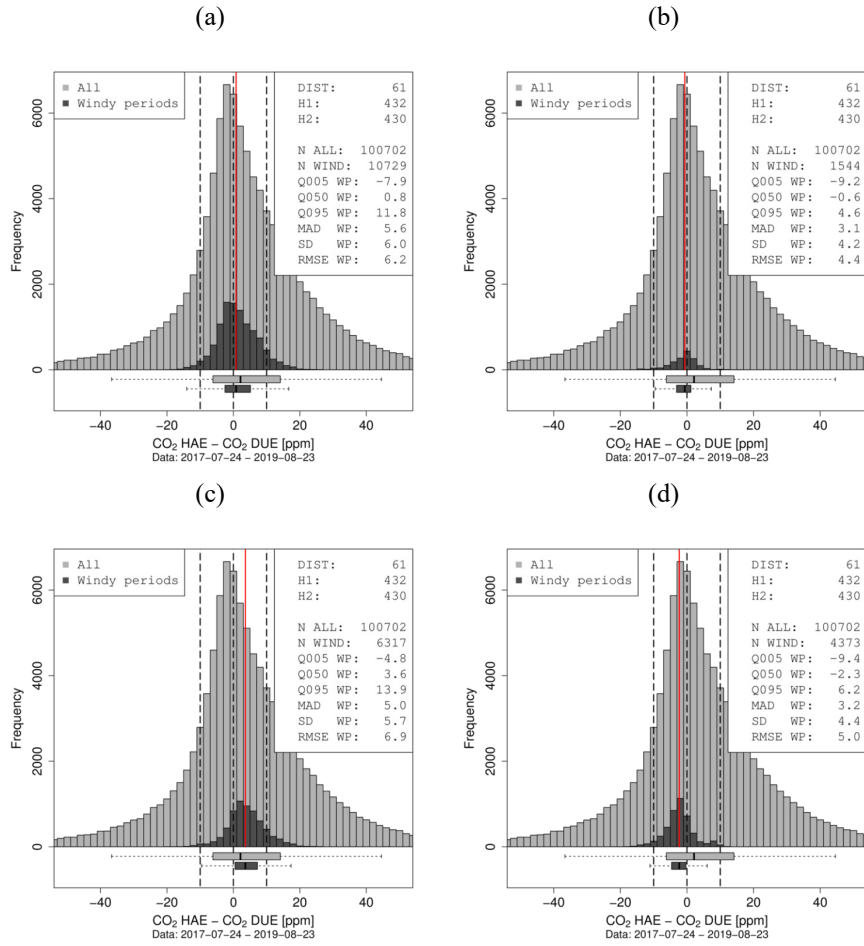

**Figure 5: Differences of 10 minutes CO<sub>2</sub> molar fractions between HAE and DUE. The histogram in light gray refers to all measurements and the histogram in dark grey refers to the measurements (a) in windy conditions, (b) in windy conditions between 22:00 and 04:00 UTC, (c) in windy conditions and wind directions between 80° to 280° (downwind the motorway) and (d) in windy conditions and wind directions between 0° and 80° / 280° and 360° (upwind the motorway). DIST denotes the distance between the two sites [km], H1 and H2 denote the altitudes of the two sites [m]. Q005 WP, Q050 WP, Q095 WP denote the 5%, 50% and 95% quantile of the CO<sub>2</sub> differences in windy conditions. MAD WP and SD WP denote the median absolute deviation and standard deviation of the CO<sub>2</sub> differences in windy conditions. RMSE WP denotes the RMSE of the CO<sub>2</sub> concentrations of the two sites in windy conditions.**

## 5 Comparison between LP8 sensors and high-precision instruments

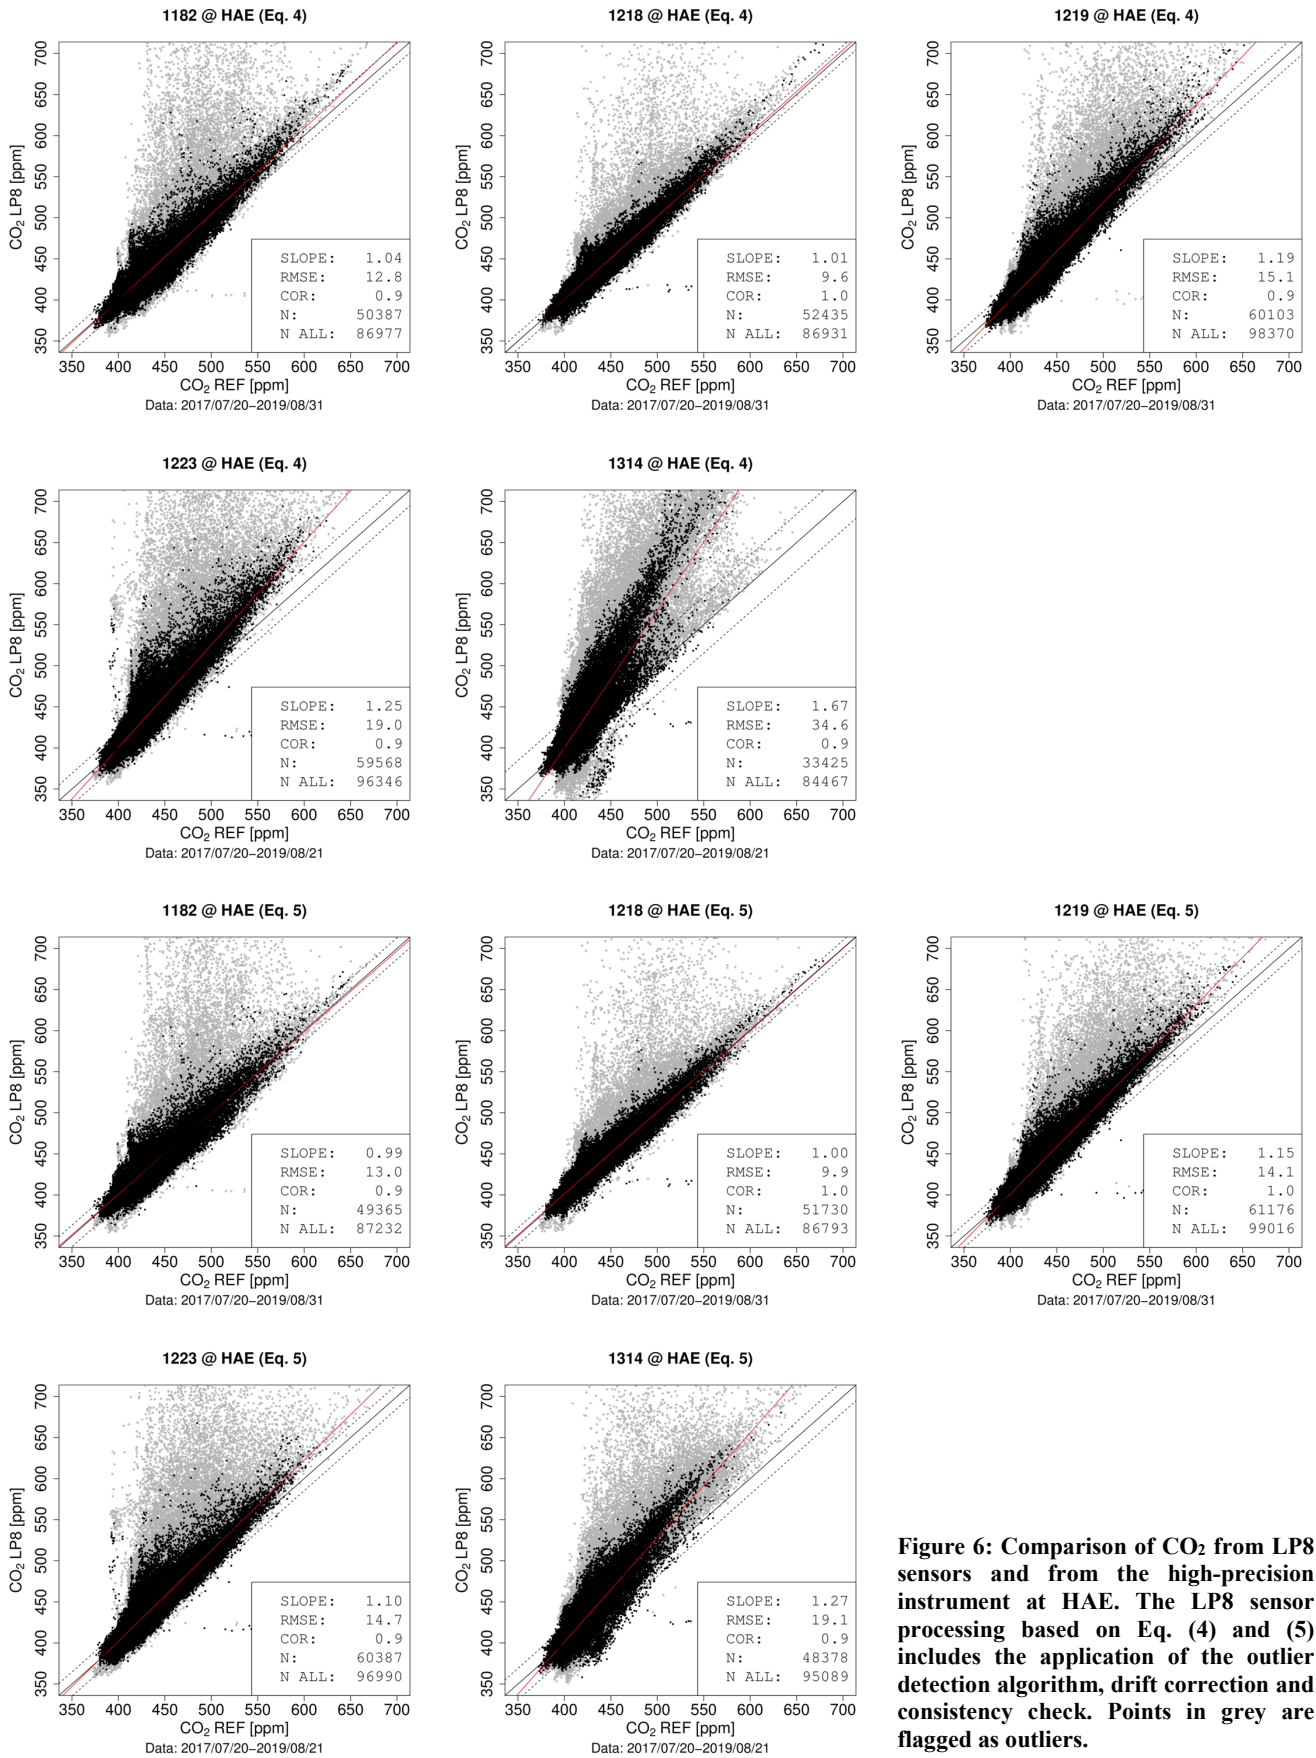

**Figure 6: Comparison of CO<sub>2</sub> from LP8 sensors and from the high-precision instrument at HAE. The LP8 sensor processing based on Eq. (4) and (5) includes the application of the outlier detection algorithm, drift correction and consistency check. Points in grey are flagged as outliers.**

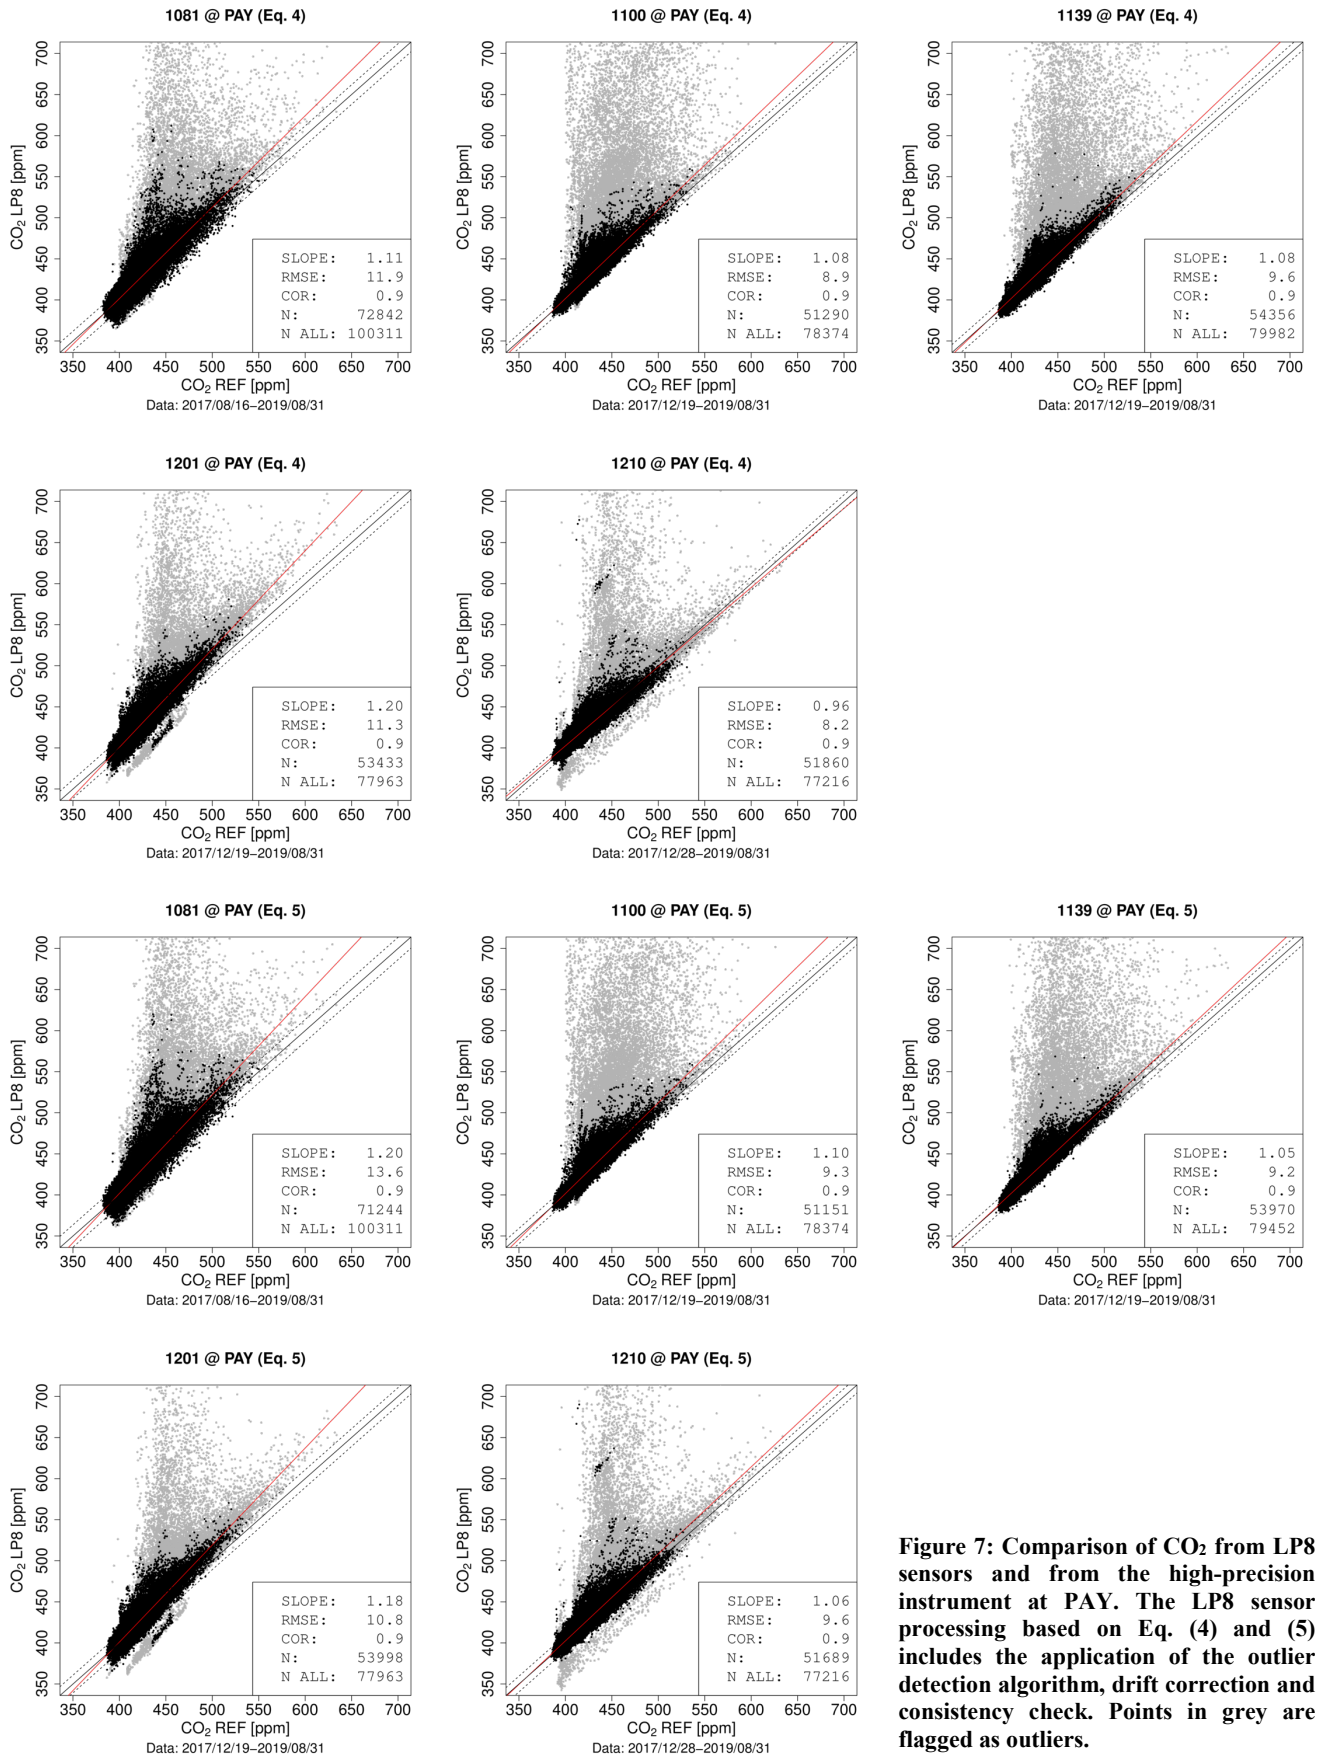

**Figure 7: Comparison of CO<sub>2</sub> from LP8 sensors and from the high-precision instrument at PAY. The LP8 sensor processing based on Eq. (4) and (5) includes the application of the outlier detection algorithm, drift correction and consistency check. Points in grey are flagged as outliers.**

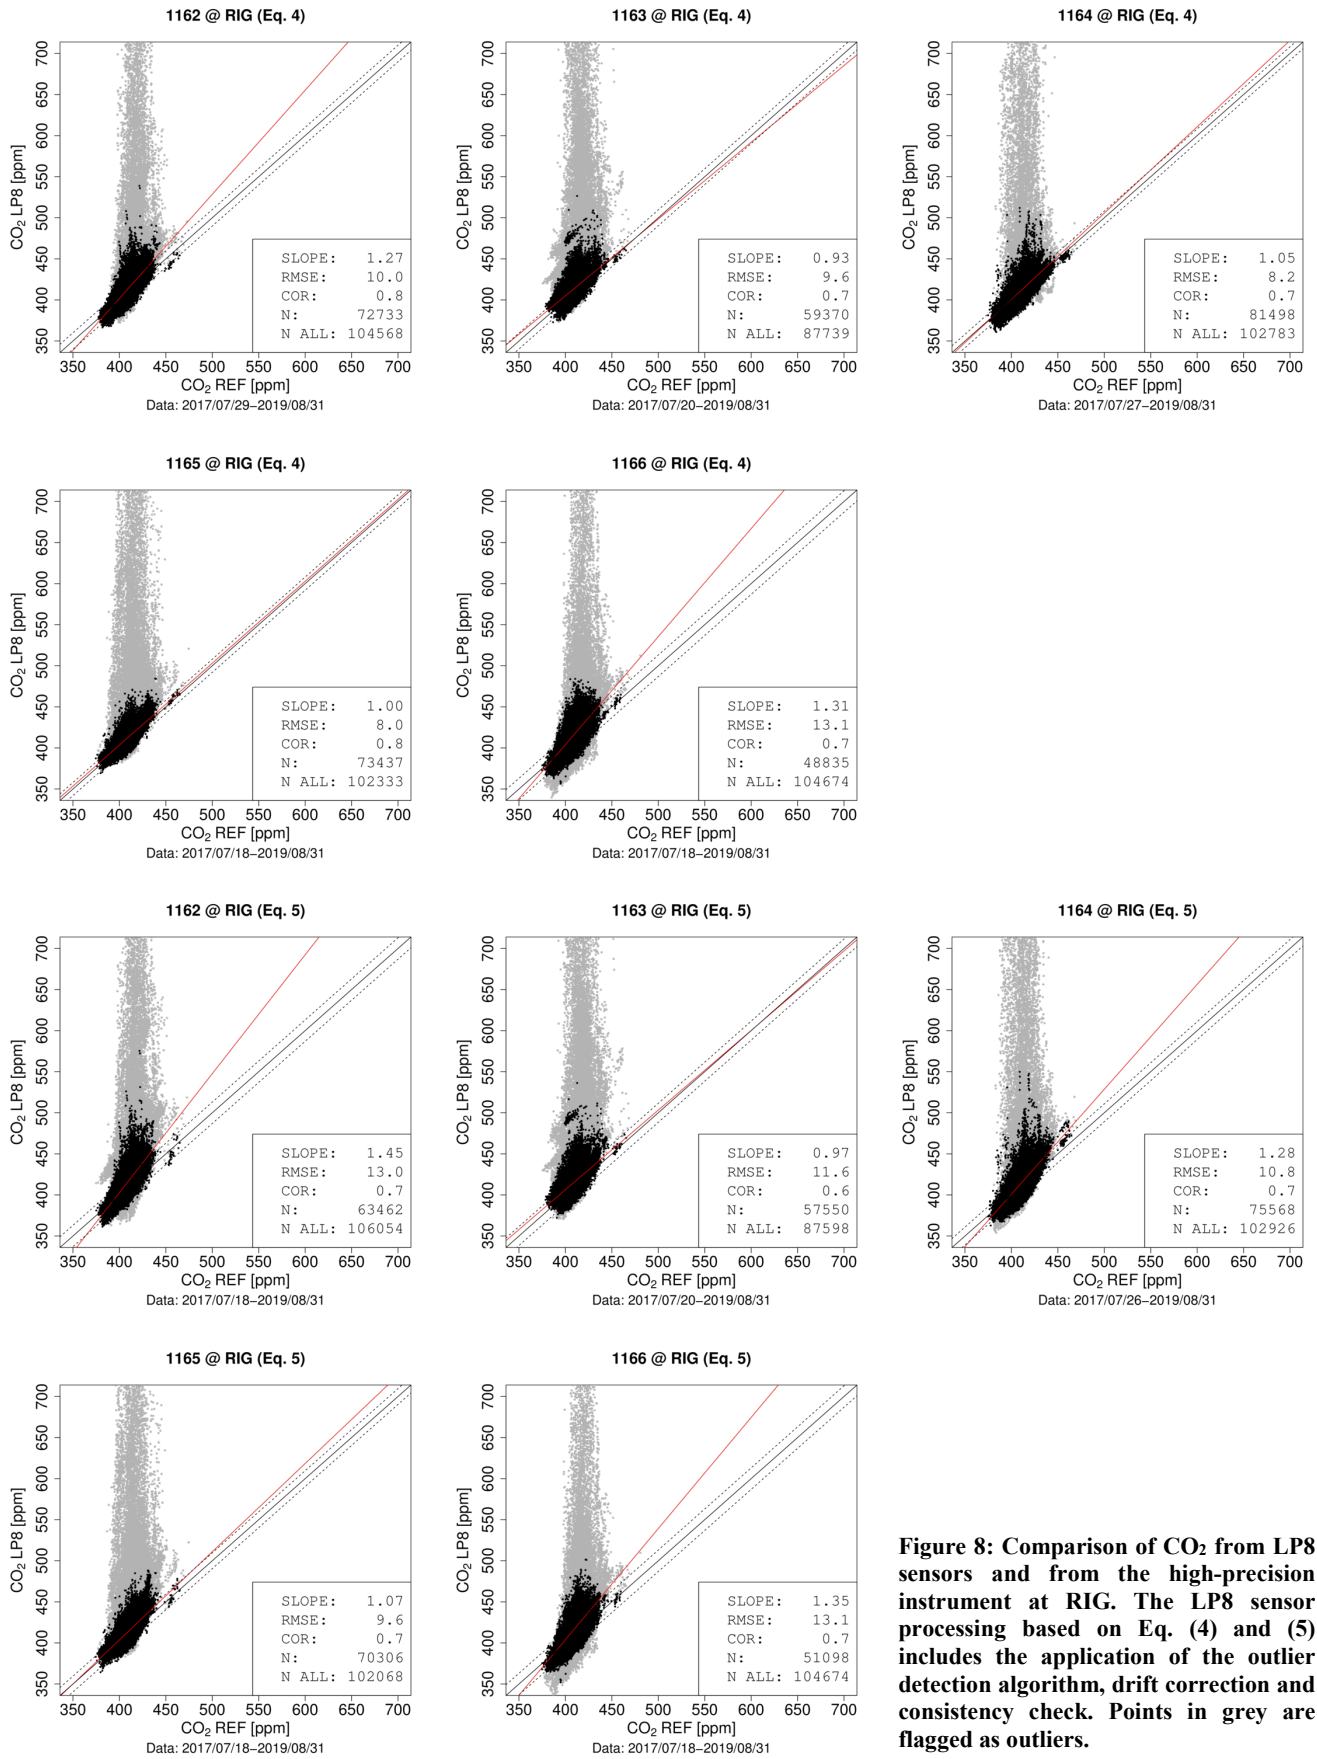

**Figure 8: Comparison of CO<sub>2</sub> from LP8 sensors and from the high-precision instrument at RIG. The LP8 sensor processing based on Eq. (4) and (5) includes the application of the outlier detection algorithm, drift correction and consistency check. Points in grey are flagged as outliers.**

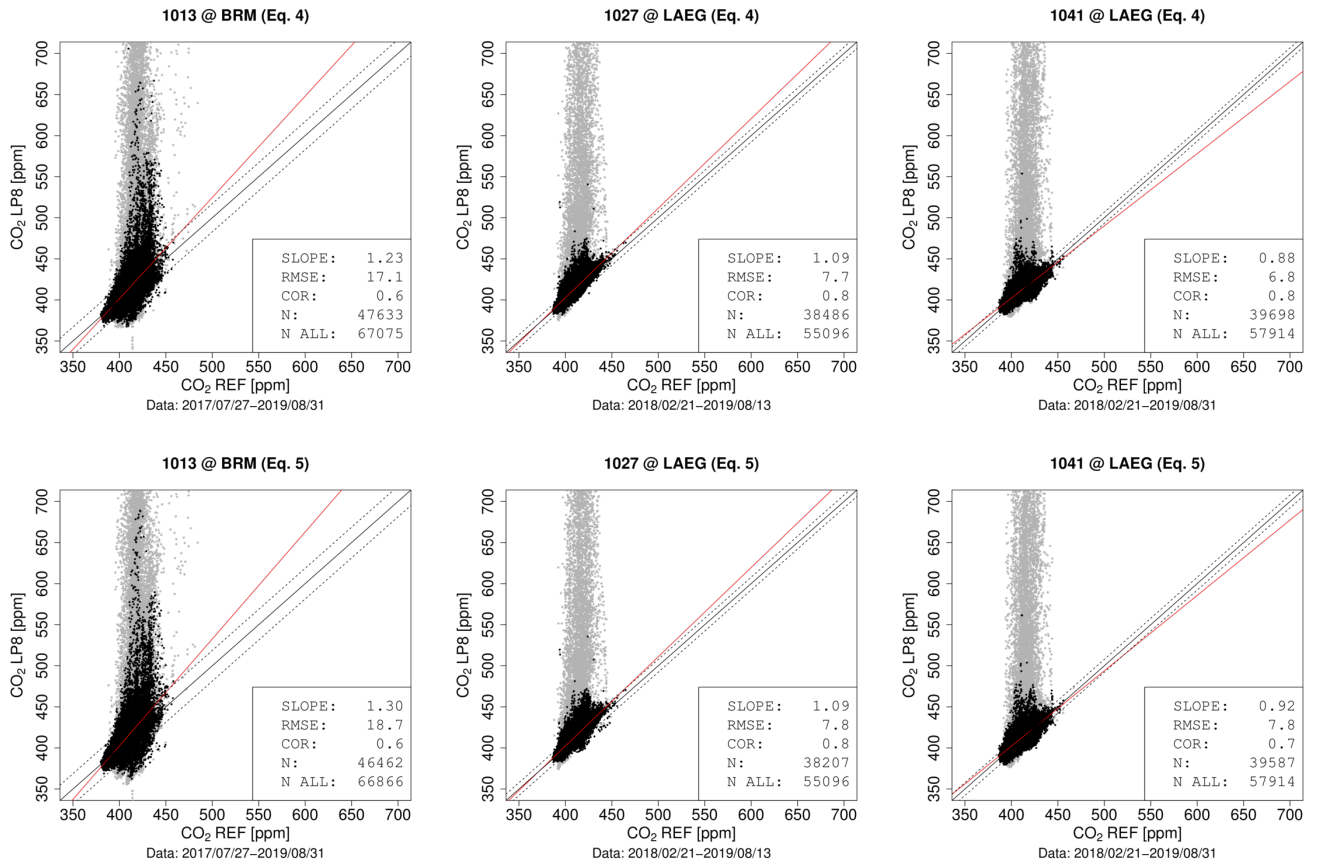

**Figure 9: Comparison of CO<sub>2</sub> from LP8 sensors and from the high-precision instrument at BRM and LAEG. The LP8 sensor processing based on Eq. (4) and (5) includes the application of the outlier detection algorithm, drift correction and consistency check. Points in grey are flagged as outliers.**

## 6 Differences between co-located sensors

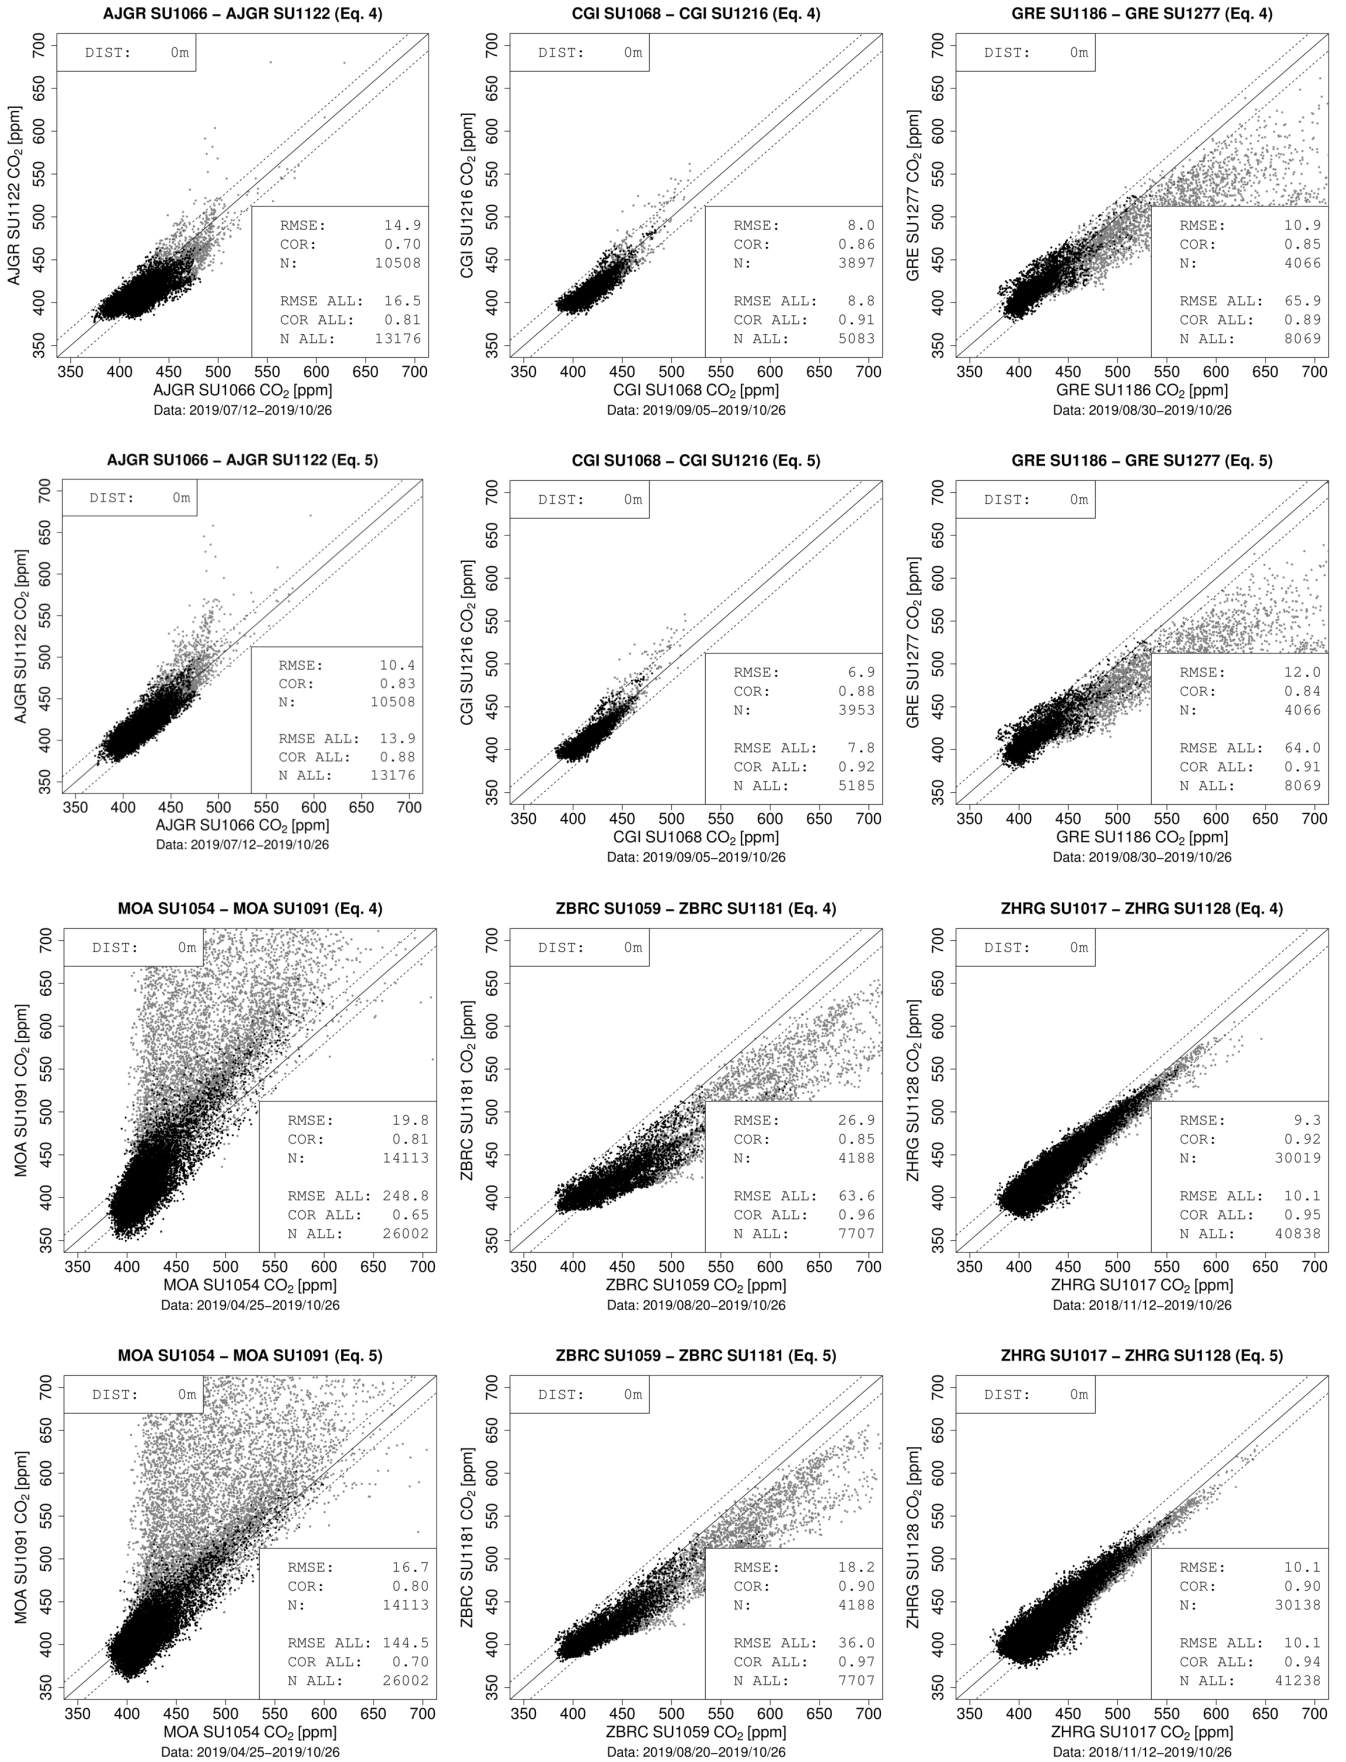

Figure 10: Comparison of LP8 measurements (drift corrected, outlier detection algorithm) from co-located sensors (distance between sensors 0 m). Points in grey are flagged as outliers. The header of the individual figures indicates the sensor pairs by the location name and the sensor unit ID as well as the sensor model.



## 7 Assessment of the performance of sensors that were replaced in the Carbosense network

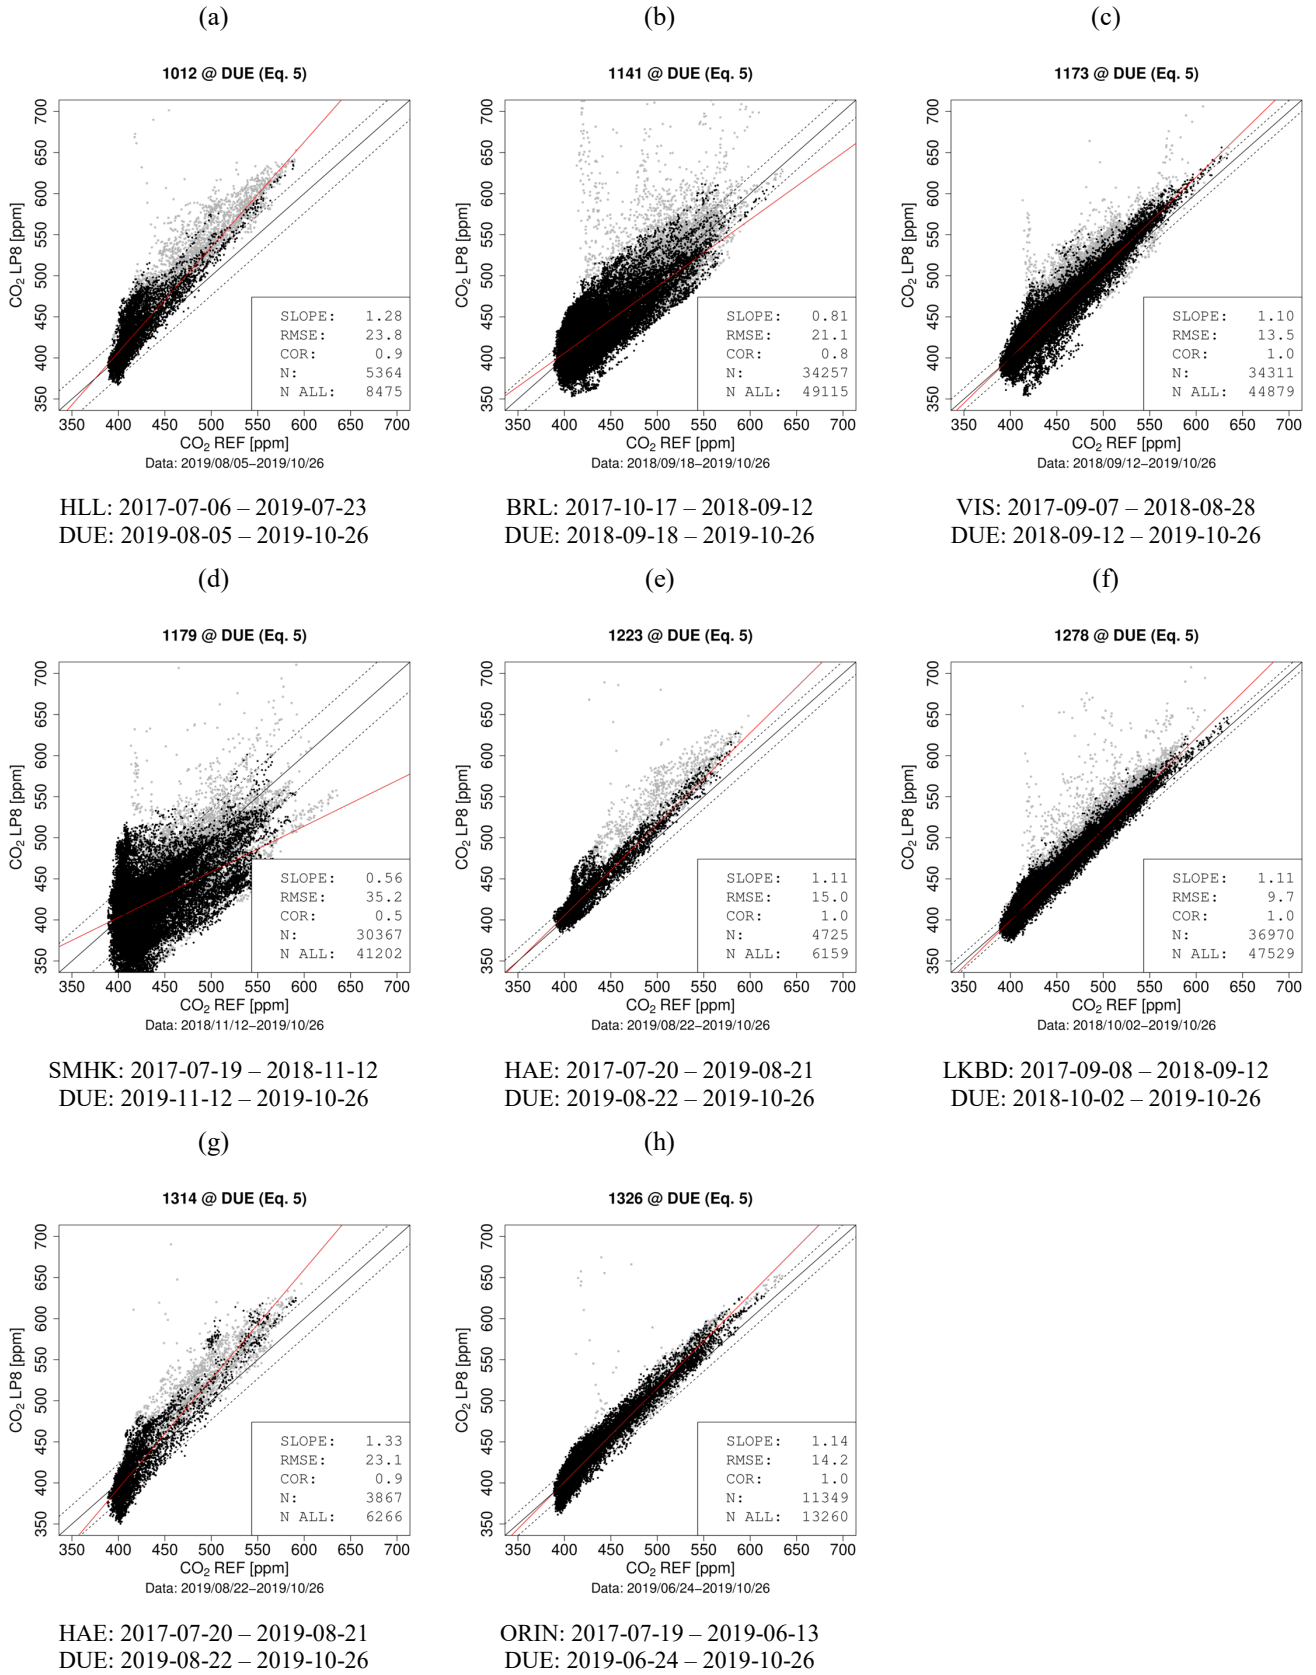

Figure 11: Performance of sensors that were deployed within the Carbosense network for a limited time period and were brought back to site DUE for review their performance. The sensors were replaced in the network due to malfunctioning (e.g. LP8 sensor fell out the board) or suspicious CO<sub>2</sub> measurements. The measurements were processed based on Eq. 5.

## **8 References**

Wagner, W. and Pruß, A.: The IAPWS Formulation 1995 for the Thermodynamic Properties of Ordinary Water Substance for General and Scientific Use. *Journal of Physical and Chemical Reference Data*, Volume 31, pp. 387-535., 2002.
